# Supplementary material for: Engineering and Purification of Microcin C7 Variants Resistant to Trypsin and Analysis of Their Biological Activity
Source: MDPI journal article supplement (doi:10.3390/antibiotics12091346), 2023-08-22
Supplement: s1 [file s1]

## Supplementary Materials

### 1. Supplementary Figures

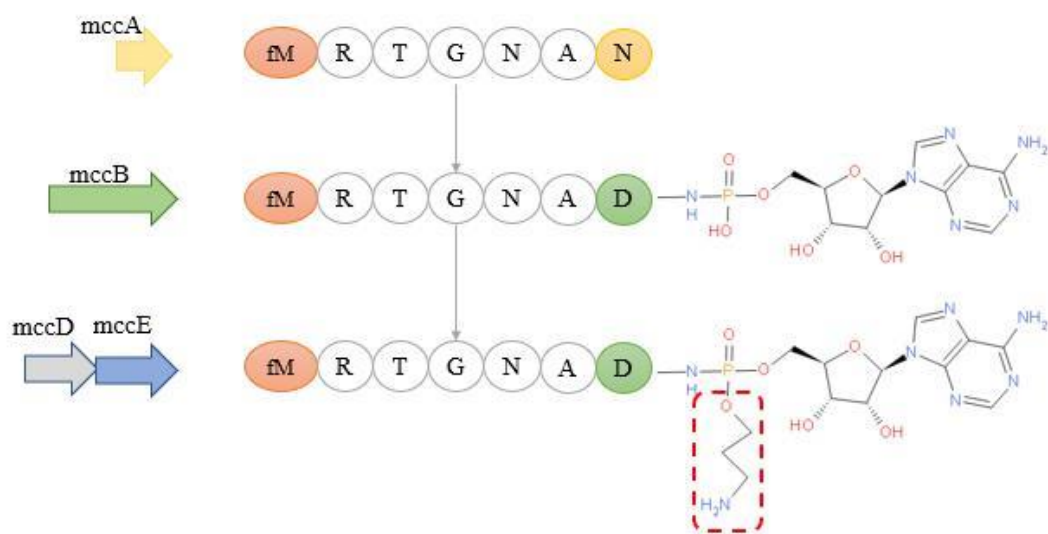

**Supplementary Figure S1.** Formation process of the McC structure. MRTGNAN is encoded by the *mccA* gene which is the shortest known natural gene. The *mccB* gene is responsible for adenylation of MccA. Aminopropyl is linked to products with MccB-catalyzed adenylation under the joint action of the *mccD* and *mccE*.

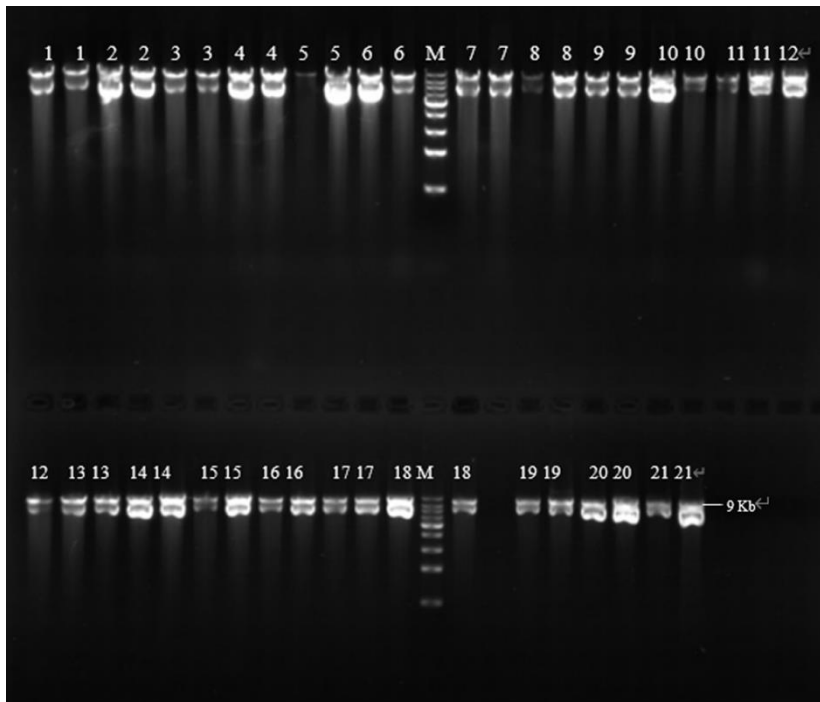

**Supplementary Figure S2.** The PCR products of McC mutants were transferred into *E. coli* MC4100 competent cells, and the extracted plasmid was subjected to 0.8% agarose gel electrophoresis, and a 9-kb fragment of the same size as expected appeared in each lane. M: DL 10,000 DNA molecular weight marker; 1: PCR products of *mccA* R2A mutant gene; 2: PCR products of *mccA* R2S mutant gene; 3: PCR products of *mccA* R2H mutant gene; 4: PCR products of *mccA* R2W mutant gene; 5: PCR products of *mccA* R2Y mutant gene; 6: PCR products of *mccA* R2L mutant gene; 7: PCR products of *mccA* R2I mutant gene; 8: PCR products of *mccA* R2V mutant gene; 9: PCR products of *mccA* R2M mutant gene; 10: PCR products of *mccA* R2T mutant gene; 11: PCR products of *mccA* R2G mutant gene; 12: PCR products of *mccA* R2C mutant gene; 13: PCR products of *mccA* R2P mutant gene; 14: PCR products of *mccA* R2F mutant gene; 15: PCR products of *mccA* R2N mutant gene; 16: PCR products of *mccA* R2Q mutant gene; 17: PCR products of *mccA* R2K mutant gene; 18: PCR products of *mccA* R2D mutant gene; 19: PCR products of *mccA* R2E mutant gene; 20: PCR products of *mccA* RPT mutant gene; 21: PCR products of *mccA* T3P mutant gene.

## 2. Supplementary Tables

**Supplementary Table S1.** Gradient elution conditions for purification

| Time (min) | Flow rate (mL/min) | Mobile phase A (%) | Mobile phase B (%) |
|------------|--------------------|--------------------|--------------------|
| 0          | 1.5                | 90                 | 10                 |
| 5          | 1.5                | 90                 | 10                 |
| 8          | 1.5                | 83                 | 17                 |
| 20         | 1.5                | 83                 | 17                 |
| 20.01      | 1.5                | 0                  | 100                |

**Supplementary Table S2.** The amount of the remaining McC and its analogues remaining was determined by RPHPLC after trypsin, pepsin and chymotrypsin treated 3 hours.

| Mutant | Trypsin treated remaining (%) | Pepsin treated remaining (%) | Chymotrypsin treated remaining (%) |
|--------|-------------------------------|------------------------------|------------------------------------|
| McC7   | 0                             | 89.32 ± 1.16                 | 41.72 ± 1.07                       |
| R2A    | 84.29 ± 0.54                  | 92.16 ± 1.04                 | 42.16 ± 0.86                       |
| R2S    | 85.33 ± 0.27                  | 84.33 ± 0.77                 | 41.33 ± 1.27                       |
| R2H    | 82.69 ± 0.82                  | 82.29 ± 0.52                 | 42.69 ± 0.69                       |
| R2W    | 0                             | 91.29 ± 1.26                 | 41.29 ± 1.03                       |
| R2Y    | 55.36 ± 0.72                  | 85.22 ± 0.72                 | 45.36 ± 1.18                       |
| R2L    | 0                             | 79.25 ± 0.62                 | 39.25 ± 0.75                       |
| R2I    | 61.27 ± 0.82                  | 91.72 ± 0.87                 | 41.27 ± 0.55                       |
| R2V    | 59.10 ± 1.41                  | 79.01 ± 1.24                 | 39.10 ± 1.05                       |
| R2M    | 48.75 ± 0.93                  | 88.67 ± 0.93                 | 43.75 ± 0.68                       |
| R2T    | 76.67 ± 0.77                  | 86.76 ± 0.77                 | 46.67 ± 0.66                       |
| R2G    | 55.65 ± 0.79                  | 85.89 ± 0.79                 | 45.65 ± 1.31                       |
| R2C    | 0                             | 82.45 ± 0.98                 | 40.85 ± 1.22                       |
| R2P    | 0                             | 86.94 ± 1.24                 | 42.77 ± 0.76                       |
| R2F    | 72.11 ± 0.94                  | 82.33 ± 0.94                 | 41.15 ± 0.98                       |
| R2N    | 0                             | 88.79 ± 0.88                 | 37.69 ± 1.10                       |
| R2Q    | 87.29 ± 1.23                  | 87.64 ± 1.23                 | 49.61 ± 1.19                       |
| R2K    | 0                             | 87.69 ± 0.68                 | 41.35 ± 0.73                       |
| R2D    | 0                             | 83.87 ± 1.42                 | 42.44 ± 1.07                       |
| R2E    | 0                             | 90.72 ± 0.74                 | 38.39 ± 0.97                       |

|     |                  |                  |                  |
|-----|------------------|------------------|------------------|
| RPT | $74.22 \pm 0.79$ | $84.56 \pm 0.79$ | $46.39 \pm 0.77$ |
| T3P | $76.75 \pm 1.33$ | $86.78 \pm 1.33$ | $39.75 \pm 0.81$ |
